# Supplementary material for: Assessment of copy number variation in genes related to drug resistance in Plasmodium vivax and Plasmodium falciparum isolates from the Brazilian Amazon and a systematic review of the literature
Source: Springer Nature journal article supplement (doi:10.1186/s12936-017-1806-z), 2017-04-18
Supplement: MOESM1 [file 12231250]

**Additional file 1. Accuracy of quantitative Real-Time PCR assay to estimate the copy number variation in genes of *Plasmodium falciparum* and *Plasmodium vivax*.**

| Sample ID | Target Name   | RQ   | RQ Min <sup>1</sup> | RQ Max <sup>1</sup> | RQ Mean <sup>2</sup> | RQ SD <sup>2</sup> | CV (%) |
|-----------|---------------|------|---------------------|---------------------|----------------------|--------------------|--------|
| 1         | <i>pfmdr1</i> | 1.18 | 0.88                | 1.59                | 1.13                 | 0.230              | 20.3   |
|           |               | 0.88 | 0.80                | 1.04                |                      |                    |        |
|           |               | 1.34 | 1.08                | 1.64                |                      |                    |        |
| 2         | <i>pfmdr1</i> | 1.00 | 0.65                | 1.54                | 0.92                 | 0.074              | 8.1    |
|           |               | 0.86 | 0.44                | 1.66                |                      |                    |        |
|           |               | 0.90 | 0.60                | 1.40                |                      |                    |        |
| 3         | <i>pfmdr1</i> | 1.10 | 0.70                | 1.60                | 1.01                 | 0.235              | 23.3   |
|           |               | 0.74 | 0.49                | 1.13                |                      |                    |        |
|           |               | 1.18 | 0.97                | 1.44                |                      |                    |        |
| 4         | <i>pfmdr1</i> | 1.07 | 0.79                | 1.45                | 0.80                 | 0.242              | 30.0   |
|           |               | 0.74 | 0.57                | 0.94                |                      |                    |        |
|           |               | 0.60 | 0.42                | 0.87                |                      |                    |        |
| 5         | <i>pfmdr1</i> | 1.07 | 0.57                | 2.00                | 1.04                 | 0.091              | 8.7    |
|           |               | 1.12 | 0.88                | 1.42                |                      |                    |        |
|           |               | 0.94 | 0.66                | 1.35                |                      |                    |        |
| 6         | <i>pfmdr1</i> | 0.90 | 0.72                | 1.12                | 0.77                 | 0.115              | 15.0   |
|           |               | 0.72 | 0.59                | 0.88                |                      |                    |        |
|           |               | 0.69 | 0.44                | 1.06                |                      |                    |        |
| 7         | <i>pvmdr1</i> | 2.14 | 1.77                | 2.59                | 1.96                 | 0.242              | 12.3   |
|           |               | 1.69 | 1.32                | 2.16                |                      |                    |        |
|           |               | 2.06 | 1.73                | 2.44                |                      |                    |        |
| 8         | <i>pvmdr1</i> | 2.70 | 2.40                | 3.10                | 2.56                 | 0.404              | 15.8   |
|           |               | 2.10 | 1.60                | 2.90                |                      |                    |        |
|           |               | 2.87 | 2.47                | 3.33                |                      |                    |        |
| 9         | <i>pvmdr1</i> | 1.01 | 0.72                | 1.42                | 1.44                 | 0.483              | 33.4   |
|           |               | 1.96 | 1.32                | 2.92                |                      |                    |        |
|           |               | 1.75 | 1.30                | 2.36                |                      |                    |        |
|           |               | 1.05 | 0.45                | 2.45                |                      |                    |        |

|           |               | 1.56 | 1.27  | 1.92                 |                    |        |      |
|-----------|---------------|------|-------|----------------------|--------------------|--------|------|
| 10        | <i>pvmdr1</i> | 1.41 | 1.11  | 1.79                 | 1.60               | 0.213  | 13.3 |
|           |               | 1.83 | 1.65  | 2.03                 |                    |        |      |
|           |               | 3.14 | 2.20  | 4.48                 |                    |        |      |
| 11        | <i>pfmdr1</i> | 2.87 | 2.22  | 3.71                 | 2.77               | 0.427  | 15.4 |
| (W2mef)   |               | 2.30 | 1.90  | 2.60                 |                    |        |      |
| Sample ID | Target Name   | RQ   | SD    | RQ Mean <sup>2</sup> | RQ SD <sup>2</sup> | CV (%) |      |
|           |               | 1.35 | 0.058 |                      |                    |        |      |
| 12        | <i>pfgchl</i> | 1.33 | 0.001 | 1.22                 | 0.204              | 16.7   |      |
|           |               | 0.99 | 0.017 |                      |                    |        |      |
|           |               | 1.35 | 0.016 |                      |                    |        |      |
| 13        | <i>pfgchl</i> | 1.79 | 0.028 | 1.38                 | 0.386              | 27.9   |      |
|           |               | 1.02 | 0.011 |                      |                    |        |      |
|           |               | 1.30 | 0.010 |                      |                    |        |      |
|           |               | 1.05 | 0.019 |                      |                    |        |      |
| 14        | <i>pfgchl</i> | 1.07 | 0.006 | 1.09                 | 0.126              | 11.6   |      |
|           |               | 1.05 | 0.008 |                      |                    |        |      |
|           |               | 0.97 | 0.014 |                      |                    |        |      |
|           |               | 0.96 | 0.012 |                      |                    |        |      |
| 15        | <i>pfgchl</i> | 1.05 | 0.01  | 1.02                 | 0.046              | 4.5    |      |
| (W2mef)   |               | 1.03 | 0.01  |                      |                    |        |      |

RQ, relative quantification; Min, minimum; Max, maximum; SD, standard deviation; CV, coefficient of variation

<sup>1</sup> Each experiment was performed in triplicate and the fold-difference in gene copy number of the sample relative to the calibrator (sample with one copy of the gene) was expressed as a range of relative quantification (RQ min and RQ max).

<sup>2</sup> Mean and standard deviation of the gene copy number estimates (RQ) considering all experiments performed to each sample.
