# Supplementary material for: Assessment of copy number variation in genes related to drug resistance in Plasmodium vivax and Plasmodium falciparum isolates from the Brazilian Amazon and a systematic review of the literature
Source: Springer Nature journal article supplement (doi:10.1186/s12936-017-1806-z), 2017-04-18
Supplement: MOESM2 [file 12231250]

**Additional file 2. Article selection by preestablished criteria.**

| Database                     | Selected | Excluded | Included |
|------------------------------|----------|----------|----------|
| Pubmed <sup>a</sup>          | 96       | 41       | 55       |
| Malaria Journal <sup>b</sup> | 135      | 117      | 18       |
| Science Direct <sup>c</sup>  | 27       | 23       | 4        |
| CAPES <sup>d</sup>           | 51       | 46       | 5        |
| TOTAL                        | 309      | 227      | 82       |

<sup>a</sup> <https://www.ncbi.nlm.nih.gov/pubmed/>

<sup>b</sup> <https://malariajournal.biomedcentral.com/>

<sup>c</sup> <http://www.sciencedirect.com/>

<sup>d</sup> <http://www.capes.gov.br/>
