# Supplementary material for: Assessment of copy number variation in genes related to drug resistance in Plasmodium vivax and Plasmodium falciparum isolates from the Brazilian Amazon and a systematic review of the literature
Source: Springer Nature journal article supplement (doi:10.1186/s12936-017-1806-z), 2017-04-18
Supplement: MOESM4 [file 12231250]

**Additional file 4. Systematic review result for copy number variation (CNV) in genes related to drug resistance in *Plasmodium vivax* and *Plasmodium falciparum* isolates worldwide.**

| <b>CNV in <i>pvmdr1</i></b> |                        |                   |                      |                         |               |               |
|-----------------------------|------------------------|-------------------|----------------------|-------------------------|---------------|---------------|
| <b>Reference</b>            | <b>Year</b>            | <b>Country</b>    | <b>N<sup>3</sup></b> | <b>Gene Copy Number</b> |               |               |
|                             |                        |                   |                      | <b>1</b>                | <b>2 to 4</b> | <b>&gt; 4</b> |
| <b>Americas</b>             |                        |                   |                      |                         |               |               |
| [72]                        | 2004-2011 <sup>1</sup> | Brazil            | 215                  | 99%                     | 1%            |               |
| [73]                        | 1997-2013 <sup>1</sup> | French Guiana     | 591                  | 69%                     | 31%           |               |
| [74]                        | 2000-2003 <sup>1</sup> | French Guiana     | 117                  | 41%                     | 56%           | 3%            |
| [83]                        | 2004-2009 <sup>1</sup> | Honduras          | 61                   | 98%                     | 2%            |               |
| <b>Africa</b>               |                        |                   |                      |                         |               |               |
| [98]                        | 2007-2009 <sup>1</sup> | Mauritania        | 105                  | 97%                     | 3%            |               |
|                             | 2007 <sup>1</sup>      | Sudan             | 59                   | 98%                     | 2%            |               |
| [74]                        | 2006-2007 <sup>1</sup> | Madagascar        | 199                  | 99%                     | 1%            |               |
| <b>Asia</b>                 |                        |                   |                      |                         |               |               |
| [86]                        | 2011 <sup>1</sup>      | Pakistan          | 108                  | 100%                    |               |               |
| [74]                        | 2010 <sup>1</sup>      | Cambodia          | 117                  | 67%                     | 33%           |               |
|                             | 2006-2007 <sup>1</sup> | Thailand          | 27                   | 93%                     | 7%            |               |
| [97]                        | 2007-2009 <sup>1</sup> | Republic of Korea | 96                   | 100%                    |               |               |
|                             | 1999 <sup>1</sup>      | Myanmar           | 11                   | 100%                    |               |               |
|                             | 2008 <sup>1</sup>      | Cambodia          | 109                  | 96%                     | 4%            |               |
| [37]                        | 2009 <sup>1</sup>      | Thailand          | 49                   | 61%                     | 39%           |               |
| [99]                        | 2008 <sup>1</sup>      | Thailand          | 1                    | 100%                    |               |               |
|                             |                        | Thailand          | 71                   | 79%                     | 21%           |               |
| [32]                        | 2003-2007 <sup>1</sup> | Indonesia         | 114                  | 100%                    |               |               |
| <b>Oceania</b>              |                        |                   |                      |                         |               |               |
| [97]                        | 2008 <sup>1</sup>      | Papua New Guinea  | 1                    | 100%                    |               |               |

---

**CNV in *pfmdr1***

---

**Americas**

|      |                        |               |     |      |     |    |
|------|------------------------|---------------|-----|------|-----|----|
| [80] | 1998 <sup>2</sup>      |               | 11  | 100% |     |    |
| [43] | 1984-2011 <sup>1</sup> | Brazil        | 96  | 62%  | 38% |    |
| [81] | 2000-2008 <sup>1</sup> | French Guiana | 547 | 61%  | 35% | 4% |
| [83] | 2004-2009 <sup>1</sup> | Honduras      | 32  | 100% |     |    |
|      | 2004-2009 <sup>1</sup> | Honduras      | 28  | 100% |     |    |
| [90] | 1999-2001 <sup>1</sup> | Colombia      | 44  | 100% |     |    |
| [69] | 2005-2006 <sup>1</sup> |               | 35  | 94%  | 6%  |    |
| [82] | 2005-2009 <sup>1</sup> | Suriname      | 63  | 89%  | 11% |    |

---

**Africa**

|       |                        |                    |     |      |     |  |
|-------|------------------------|--------------------|-----|------|-----|--|
|       | 1978-1981 <sup>1</sup> | Liberia            | 30  | 100% |     |  |
|       | 2001-2004 <sup>1</sup> | Guinea Bissau      | 50  | 100% |     |  |
| [90]  | 2002 <sup>1</sup>      | Vanuatu            | 9   | 100% |     |  |
|       | 2008 <sup>1</sup>      | Tanzania           | 46  | 100% |     |  |
| [100] | 2004-2011 <sup>1</sup> | Tanzania           | 390 | 100% |     |  |
| [101] | 1993 <sup>1</sup>      |                    | 13  | 85%  | 15% |  |
| [102] | 2008-2011 <sup>1</sup> | sub-Saharan Africa | 28  | 91%  | 9%  |  |
| [103] | 2007 <sup>1</sup>      |                    | 253 | 100% |     |  |
| [104] | 2005-2008 <sup>1</sup> | Kenya              | 78  | 100% |     |  |
| [105] | 2004 <sup>1</sup>      |                    | 58  | 98%  | 2%  |  |
|       |                        | Kenya              | 1   | 100% |     |  |
|       |                        | Burkina Faso       | 1   | 100% |     |  |
| [106] | 2012 <sup>1</sup>      | Sudan              | 1   | 100% |     |  |
|       |                        | Nigeria            | 2   | 100% |     |  |
|       |                        | Ghana              | 2   | 100% |     |  |
| [45]  | 2003-2010 <sup>1</sup> | Ghana              | 446 | 92%  | 8%  |  |
| [107] | 2006-2007 <sup>1</sup> | Nigeria            | 16  | 100% |     |  |

|       |                        |                                       |      |      |      |  |
|-------|------------------------|---------------------------------------|------|------|------|--|
| [108] |                        |                                       | 8    | 100% |      |  |
| [109] | 2004 <sup>1</sup>      | São Tomé and Príncipe                 | 8    | 100% |      |  |
| [110] | 2005-2008 <sup>1</sup> | Benin                                 | 160  | 100% |      |  |
| [111] | 2005-2009 <sup>1</sup> | Cameroon                              | 215  | 100% |      |  |
| [112] | 2006-2007 <sup>1</sup> |                                       | 290  | 100% |      |  |
| [113] | 2006-2008 <sup>1</sup> | Madagascar                            | 583  | 100% |      |  |
| [29]  | 2006 <sup>2</sup>      |                                       | 2    |      | 100% |  |
| [93]  | 2007-2008 <sup>1</sup> | Uganda                                | 9    | 100% |      |  |
| [114] | 2010-2011 <sup>1</sup> |                                       | 57   | 100% |      |  |
| [115] | 2007 <sup>1</sup>      | Malawi                                | 160  | 100% |      |  |
| [116] | 2009-2010 <sup>1</sup> | Senegal                               | 174  | 99%  | 1%   |  |
| [117] | 2011 <sup>2</sup>      | Sudan                                 | 55   | 96%  | 4%   |  |
| [118] | 2000-2011 <sup>1</sup> | KwaZulu-Natal, Limpopo,<br>Mpumalanga | 2010 | 100% |      |  |
| [119] | 2012 <sup>1</sup>      | KwaZulu-Natal                         | 16   | 100% |      |  |
| [120] | 2011 <sup>1</sup>      |                                       | 195  | 100% |      |  |
| [121] | 2013 <sup>1</sup>      | Ethiopia                              | 133  | 45%  | 55%  |  |
| [122] | 2013 <sup>1</sup>      |                                       | 177  | 100% |      |  |

---

**Asia**

|       |                        |          |     |      |     |    |
|-------|------------------------|----------|-----|------|-----|----|
| [123] | 2005-2007 <sup>1</sup> |          | 232 | 99%  | 1%  |    |
| [86]  | 2011 <sup>1</sup>      | Pakistan | 171 | 100% |     |    |
| [87]  | 1992 <sup>1</sup>      |          | 10  | 100% |     |    |
| [124] | 2002-2004 <sup>1</sup> |          | 224 | 81%  | 16% | 3% |
| [125] | 2004-2006 <sup>1</sup> |          | 93  | 67%  | 33% |    |
| [126] | 2009-2010 <sup>1</sup> | Cambodia | 182 | 65%  | 33% | 2% |
| [127] | 2011-2013 <sup>1</sup> |          | 419 | 19%  | 81% |    |
| [128] | 2008-2013 <sup>1</sup> |          | 644 | 67%  | 33% |    |
| [129] | 2015 <sup>2</sup>      |          | 12  | 42%  | 58% |    |

|       |                        |                                 |       |      |      |     |
|-------|------------------------|---------------------------------|-------|------|------|-----|
| [88]  | 2007-2010 <sup>1</sup> | Afghanistan                     | 120   | 100% |      |     |
| [89]  | 2007-2010 <sup>1</sup> |                                 | 200   | 100% |      |     |
| [90]  | 2001-2002 <sup>1</sup> | Iran                            | 36    | 100% |      |     |
| [66]  | 1992 <sup>1</sup>      | Myanmar, Bangladesh,<br>Vietnam | 26    | 88%  | 12%  |     |
| [66]  | 1992 <sup>1</sup>      |                                 | 39    | 88%  | 12%  |     |
| [90]  | 2002-2008 <sup>1</sup> |                                 | 49    | 53%  | 47%  |     |
| [130] | 1990 <sup>1</sup>      |                                 | 11    | 9%   | 91%  |     |
| [27]  | 1990-2002 <sup>1</sup> |                                 | 187   | 46%  | 53%  | 1%  |
| [131] | 1990-2002 <sup>1</sup> |                                 | 132   | 30%  | 70%  |     |
| [132] | 1993-1994 <sup>1</sup> |                                 | 5     | 80%  | 20%  |     |
| [133] | 1995-1997 <sup>1</sup> |                                 | 54    | 69%  | 27%  | 4%  |
| [134] | 1997 <sup>2</sup>      | Thailand                        | 10    | 50%  | 50%  |     |
| [135] | 2000-2003 <sup>1</sup> |                                 | 326   | 66%  | 34%  |     |
| [136] | 2002-2008 <sup>1</sup> |                                 | 46    | 48%  | 35%  | 17% |
| [137] | 2006-2008 <sup>1</sup> |                                 | 78    | 77%  | 23%  |     |
| [138] | 2009 <sup>1</sup>      |                                 | 96    | 74%  | 26%  |     |
| [139] | 2009 <sup>1</sup>      |                                 | 117   | 72%  | 28%  |     |
| [140] | 2009 <sup>1</sup>      |                                 | 1.116 | 88%  | 12%  |     |
| [141] | 2008-2009 <sup>1</sup> |                                 | 91    | 40%  | 60%  |     |
| [142] | 2007-2008 <sup>1</sup> |                                 | 26    | 54%  | 35%  | 1%  |
| [143] | 2001-2002 <sup>1</sup> |                                 | 51    | 90%  | 10%  |     |
| [144] | 2010 <sup>1</sup>      |                                 | 44    | 64%  | 22%  | 14% |
| [145] | 2007-2009 <sup>1</sup> |                                 | 63    | 48%  | 24%  | 21% |
| [146] | 2006-2009 <sup>1</sup> | Thailand-Myanmar border         | 123   | 49%  | 46%  | 5%  |
| [147] | 2002-2008 <sup>1</sup> |                                 | 46    | 48%  | 52%  |     |
| [148] | 2009-2010 <sup>1</sup> |                                 | 168   | 62%  | 38%  |     |
| [149] | 2003-2013 <sup>1</sup> |                                 | 791   | 46%  | 54%  |     |
| [84]  | 2003-2005 <sup>1</sup> | Thailand-Myanmar border         | 68    |      | 100% |     |
|       |                        | Thailand-Cambodia border        | 21    | 100% |      |     |

|                             |                        |                          |     |      |      |
|-----------------------------|------------------------|--------------------------|-----|------|------|
| [85]                        | 2003-2008 <sup>1</sup> | Thailand-Myanmar border  | 37  |      | 100% |
|                             |                        | Thailand-Cambodia border | 48  | 100% |      |
| [150]                       | 2007 <sup>1</sup>      | Indonesia                | 232 | 86%  | 14%  |
| [151]                       | 2011-2014 <sup>1</sup> | Malaysia                 | 38  | 100% |      |
| [152]                       | 2009-2010 <sup>1</sup> |                          | 75  | 99%  | 1%   |
| [153]                       | 2012 <sup>1</sup>      | India                    | 30  | 100% |      |
| <b>Oceania</b>              |                        |                          |     |      |      |
| [154]                       | 2003-2005 <sup>1</sup> | Papua New Guinea         | 405 | 100% |      |
| <b>CNV in <i>pfgch1</i></b> |                        |                          |     |      |      |
| <b>Africa</b>               |                        |                          |     |      |      |
| [93]                        | 2007-2008 <sup>1</sup> | Uganda                   | 9   | 100% |      |
| <b>Asia</b>                 |                        |                          |     |      |      |
|                             | 2000-2003 <sup>1</sup> | Thailand                 | 140 | 28%  | 72%  |
| [28]                        | 2002-2003 <sup>1</sup> | Laos                     | 122 | 98%  | 2%   |

<sup>1</sup> Year of sample collection

<sup>2</sup> Date of publication of the article

<sup>3</sup> Number of isolates

### Additional References

98. Lekweiry KM, Basco LK, Salem MS, Hafid JE, Marin-Jauffre A, Weddih AO, et al. Malaria prevalence and morbidity among children reporting at health facilities in Nouakchott, Mauritania. *Trans R Soc Trop Med Hyg.* 2011; 105:727-33.
99. Rijken MJ, Boel ME, Russell B, Imwong M, Leimanis ML, Phyo AP, et al. Chloroquine resistant *vivax* malaria in a pregnant woman on the western border of Thailand. *Malar J.* 2011; 10:113.

100. Malmberg M, Ngasala B, Ferreira PE, Larsson E, Jovel I, Hjalmarsson A, et al. Temporal trends of molecular markers associated with artemether-lumefantrine tolerance/resistance in Bagamoyo district, Tanzania. *Malar J.* 2013; 12:103.
101. Basco LK, Le Bras J, Rhoades Z, Wilson CM. Analysis of *pfmdr1* and drug susceptibility in fresh isolates of *Plasmodium falciparum* from subsaharan Africa. *Mol Biochem Parasitol.* 1995; 74:157-66.
102. Pillai DR, Lau R, Khairnar K, Lepore R, Via A, Staines HM, et al. Artemether resistance in vitro is linked to mutations in *PfATP6* that also interact with mutations in *PfMDR1* in travellers returning with *Plasmodium falciparum* infections. *Malar J.* 2012; 11:131.
103. Shah M, Omosun Y, Lal A, Odero C, Gatei W, Otieno K, et al. Assessment of molecular markers for anti-malarial drug resistance after the introduction and scale-up of malaria control interventions in western Kenya. *Malar J.* 2015; 14:75.
104. Mwai L, Kiara SM, Abdirahman A, Pole L, Rippert A, Diriye A, et al. *In vitro* activities of piperazine, lumefantrine, and dihydroartemisinin in Kenyan *Plasmodium falciparum* isolates and polymorphisms in *pfprt* and *pfmdr1*. *Antimicrob Agents Chemother.* 2009; 53:5069-73.
105. Holmgren G, Bjorkman A, Gil JP: Amodiaquine resistance is not related to rare findings of *pfmdr1* gene amplifications in Kenya. *Trop Med Int Health.* 2006; 11:1808-12.
106. van Schalkwyk DA, Burrow R, Henriques G, Gadalla NB, Beshir KB, Hasford C, et al. Culture-adapted *Plasmodium falciparum* isolates from UK travellers: *in vitro* drug sensitivity, clonality and drug resistance markers. *Malar J.* 2013; 12:320.
107. Happi CT, Gbotosho GO, Folarin OA, Sowunmi A, Hudson T, O'Neil M, et al. Selection of *Plasmodium falciparum* multidrug resistance gene 1 alleles in asexual stages and gametocytes by artemether-lumefantrine in Nigerian children with uncomplicated *falciparum* malaria. *Antimicrob Agents Chemother.* 2009; 53:888-95.
108. Ferreira ID, Lopes D, Martinelli A, Ferreira C, do Rosario VE, Cravo P. *In vitro* assessment of artesunate, artemether and amodiaquine susceptibility and molecular analysis of putative

resistance-associated mutations of *Plasmodium falciparum* from Sao Tome and Principe. Trop Med Int Health. 2007; 12:353-62.

109. Ferreira ID, Rosario VE, Cravo PV. Real-time quantitative PCR with SYBR Green I detection for estimating copy numbers of nine drug resistance candidate genes in *Plasmodium falciparum*. Malar J. 2006; 5:1.

110. Bertin G, Briand V, Bonaventure D, Carrieu A, Massougbody A, Cot M, et al. Molecular markers of resistance to sulphadoxine-pyrimethamine during intermittent preventive treatment of pregnant women in Benin. Malar J. 2011; 10:196.

111. Menard S, Morlais I, Tahar R, Sayang C, Mayengue PI, Iriart X, et al. Molecular monitoring of *Plasmodium falciparum* drug susceptibility at the time of the introduction of artemisinin-based combination therapy in Yaounde, Cameroon: implications for the future. Malar J. 2012; 11:113.

112. Andriantsoanirina V, Ratsimbaoa A, Bouchier C, Tichit M, Jahevitra M, Rabearimanana S, et al. Chloroquine clinical failures in *P. falciparum* malaria are associated with mutant *Pfmdr-1*, not *Pfprt* in Madagascar. PLoS One. 2010; 5:e13281.

113. Andriantsoanirina V, Ratsimbaoa A, Bouchier C, Jahevitra M, Rabearimanana S, Radrianjafy R, et al. *Plasmodium falciparum* drug resistance in Madagascar: facing the spread of unusual *pfdhfr* and *pfmdr-1* haplotypes and the decrease of dihydroartemisinin susceptibility. Antimicrob Agents Chemother. 2009; 53:4588-97.

114. Ochong E, Tumwebaze PK, Byaruhanga O, Greenhouse B, Rosenthal PJ. Fitness consequences of *Plasmodium falciparum* *pfmdr1* polymorphisms inferred from *ex vivo* culture of Ugandan parasites. Antimicrob Agents Chemother. 2013; 57:4245-51.

115. Nkhoma S, Nair S, Mukaka M, Molyneux ME, Ward SA, Anderson TJ. Parasites bearing a single copy of the multi-drug resistance gene (*pfmdr-1*) with wild-type SNPs predominate amongst *Plasmodium falciparum* isolates from Malawi. Acta Trop. 2009; 111:78-81.

116. Wurtz N, Fall B, Pascual A, Diawara S, Sow K, Baret E, et al. Prevalence of molecular markers of *Plasmodium falciparum* drug resistance in Dakar, Senegal. Malar J. 2012; 11:197.

117. Gadalla NB, Adam I, Elzaki SE, Bashir S, Mukhtar I, Oguike M, et al. Increased *pfmdr1* copy number and sequence polymorphisms in *Plasmodium falciparum* isolates from Sudanese malaria patients treated with artemether-lumefantrine. *Antimicrob Agents Chemother.* 2011; 55:5408-11.
118. Maharaj R, Morris N, Seocharan I, Kruger P, Moonasar D, Mabuza A, et al. The feasibility of malaria elimination in South Africa. *Malar J.* 2012; 11:423.
119. Vaughan-Williams CH, Raman J, Raswiswi E, Immelman E, Reichel H, Gate K, et al. Assessment of the therapeutic efficacy of artemether-lumefantrine in the treatment of uncomplicated *Plasmodium falciparum* malaria in northern KwaZulu-Natal: an observational cohort study. *Malar J.* 2012; 11:434.
120. Mekonnen SK, Aseffa A, Berhe N, Teklehaymanot T, Clouse RM, Gebru T, et al. Return of chloroquine-sensitive *Plasmodium falciparum* parasites and emergence of chloroquine-resistant *Plasmodium vivax* in Ethiopia. *Malar J.* 2014; 13:244.
121. Tajebe A, Aemero M, Francis K, Magoma G. Identification of chloroquine resistance *Pfcrtr*-K76T and determination of *Pfmdr1*-N86Y copy number by SYBR Green I qPCR. *Asian Pac J Trop Biomed.* 2015; 5:208–20.
122. Heuchert A, Abduselam N, Zeynudin A, Eshetu T, Loscher T, Wieser A, et al. Molecular markers of anti-malarial drug resistance in southwest Ethiopia over time: regional surveillance from 2006 to 2013. *Malar J.* 2015; 14:208.
123. Ghanchi NK, Ursing J, Beg MA, Veiga MI, Jafri S, Martensson A. Prevalence of resistance associated polymorphisms in *Plasmodium falciparum* field isolates from southern Pakistan. *Malar J.* 2011; 10:18.
124. Lim P, Alker AP, Khim N, Shah NK, Incardona S, Doung S, et al. *Pfmdr1* copy number and artemisinin derivatives combination therapy failure in *falciparum* malaria in Cambodia. *Malar J.* 2009; 8:11.



125. Vinayak S, Alam MT, Sem R, Shah NK, Susanti AI, Lim P, et al. Multiple genetic backgrounds of the amplified *Plasmodium falciparum* multidrug resistance (*pfmdr1*) gene and selective sweep of 184F mutation in Cambodia. *J Infect Dis.* 2010; 201:1551-60.
126. Lanteri CA, Chaorattanakawee S, Lon C, Saunders DL, Rutvisuttinunt W, Yingyuen K, et al. *Ex vivo* activity of endoperoxide antimalarials, including artemisone and arterolane, against multidrug-resistant *Plasmodium falciparum* isolates from Cambodia. *Antimicrob Agents Chemother.* 2014; 58:5831-40.
127. Leang R, Taylor WR, Bouth DM, Song L, Tarning J, Char MC, et al. Evidence of *Plasmodium falciparum* Malaria Multidrug Resistance to Artemisinin and Piperaquine in Western Cambodia: Dihydroartemisinin-Piperaquine Open-Label Multicenter Clinical Assessment. *Antimicrob Agents Chemother.* 2015; 59:4719-26.
128. Chaorattanakawee S, Saunders DL, Sea D, Chanarat N, Yingyuen K, Sundrakes S, et al. *Ex Vivo* Drug Susceptibility Testing and Molecular Profiling of Clinical *Plasmodium falciparum* Isolates from Cambodia from 2008 to 2013 Suggest Emerging Piperaquine Resistance. *Antimicrob Agents Chemother.* 2015; 59:4631-43.
129. Chaorattanakawee S, Lanteri CA, Sundrakes S, Yingyuen K, Gosi P, Chanarat N, et al. Attenuation of *Plasmodium falciparum in vitro* drug resistance phenotype following culture adaptation compared to fresh clinical isolates in Cambodia. *Malar J.* 2015; 14:486.
130. Wilson CM, Volkman SK, Thaithong S, Martin RK, Kyle DE, Milhous WK, et al. Amplification of *pfmdr 1* associated with mefloquine and halofantrine resistance in *Plasmodium falciparum* from Thailand. *Mol Biochem Parasitol.* 1993; 57:151-60.
131. Uhlemann AC, McGready R, Ashley EA, Brockman A, Singhasivanon P, Krishna S, et al. Intra-host selection of *Plasmodium falciparum pfmdr1* alleles after antimalarial treatment on the northwestern border of Thailand. *J Infect Dis.* 2007; 195:134-41.
132. Mungthin M, Bray PG, Ward SA. Phenotypic and genotypic characteristics of recently adapted isolates of *Plasmodium falciparum* from Thailand. *Am J Trop Med Hyg.* 1999; 60:469-74.

133. Price RN, Cassar C, Brockman A, Duraisingh M, van Vugt M, White NJ, et al. The *pfmdr1* gene is associated with a multidrug-resistant phenotype in *Plasmodium falciparum* from the western border of Thailand. *Antimicrob Agents Chemother.* 1999; 43:2943-49.
134. Price R, Robinson G, Brockman A, Cowman A, Krishna S. Assessment of *pfmdr1* gene copy number by tandem competitive polymerase chain reaction. *Mol Biochem Parasitol.* 1997; 85:161-69.
135. Nair S, Nash D, Sudimack D, Jaidee A, Barends M, Uhlemann AC, et al. Recurrent gene amplification and soft selective sweeps during evolution of multidrug resistance in malaria parasites. *Mol Biol Evol.* 2007; 24:562-73.
136. Veiga MI, Ferreira PE, Jornhagen L, Malmberg M, Kone A, Schmidt BA, et al. Novel polymorphisms in *Plasmodium falciparum* ABC transporter genes are associated with major ACT antimalarial drug resistance. *PLoS One.* 2011; 6:e20212.
137. Imwong M, Dondorp AM, Nosten F, Yi P, Mungthin M, Hanchana S, et al. Exploring the contribution of candidate genes to artemisinin resistance in *Plasmodium falciparum*. *Antimicrob Agents Chemother.* 2010; 54:2886-92.
138. Muhamad P, Chaijaroenkul W, Congpuong K, Na-Bangchang K. SYBR Green I and TaqMan quantitative real-time polymerase chain reaction methods for the determination of amplification of *Plasmodium falciparum* multidrug resistance-1 gene (*pfmdr1*). *J Parasitol.* 2011; 97:939-42.
139. Muhamad P, Phompradit P, Sornjai W, Maensathian T, Chaijaroenkul W, Rueangweerayut R, et al. Polymorphisms of molecular markers of antimalarial drug resistance and relationship with artesunate-mefloquine combination therapy in patients with uncomplicated *Plasmodium falciparum* malaria in Thailand. *Am J Trop Med Hyg.* 2011; 85:568-72.
140. Mungthin M, Intanakom S, Suwandittakul N, Suida P, Amsakul S, Sitthichot N, et al. Distribution of *pfmdr1* polymorphisms in *Plasmodium falciparum* isolated from Southern Thailand. *Malar J.* 2014; 13:117.

141. Na-Bangchang K, Muhamad P, Ruaengweerayut R, Chaijaroenkul W, Karbwang J. Identification of resistance of *Plasmodium falciparum* to artesunate-mefloquine combination in an area along the Thai-Myanmar border: integration of clinico-parasitological response, systemic drug exposure, and *in vitro* parasite sensitivity. *Malar J.* 2013; 12:263.
142. Chaijaroenkul W, Wisedpanichkij R, Na-Bangchang K. Monitoring of *in vitro* susceptibilities and molecular markers of resistance of *Plasmodium falciparum* isolates from Thai-Myanmar border to chloroquine, quinine, mefloquine and artesunate. *Acta Trop.* 2010; 113:190-94.
143. Nelson AL, Purfield A, McDaniel P, Uthaimongkol N, Buathong N, Sriwichai S, et al. *pfmdr1* genotyping and *in vivo* mefloquine resistance on the Thai-Myanmar border. *Am J Trop Med Hyg.* 2005; 72:586-92.
144. Phompradit P, Muhamad P, Chaijaroenkul W, Na-Bangchang K. Genetic polymorphisms of candidate markers and *in vitro* susceptibility of *Plasmodium falciparum* isolates from Thai-Myanmar border in relation to clinical response to artesunate-mefloquine combination. *Acta Trop.* 2014; 139:77-83.
145. Phompradit P, Wisedpanichkij R, Muhamad P, Chaijaroenkul W, Na-Bangchang K. Molecular analysis of *pfatp6* and *pfmdr1* polymorphisms and their association with *in vitro* sensitivity in *Plasmodium falciparum* isolates from the Thai-Myanmar border. *Acta Trop.* 2011; 120:130-35.
146. Phompradit P, Muhamad P, Wisedpanichkij R, Chaijaroenkul W, Na-Bangchang K. Four years' monitoring of *in vitro* sensitivity and candidate molecular markers of resistance of *Plasmodium falciparum* to artesunate-mefloquine combination in the Thai-Myanmar border. *Malar J.* 2014; 13:23.
147. Veiga MI, Ferreira PE, Malmberg M, Jornhagen L, Bjorkman A, Nosten F, et al. *pfmdr1* amplification is related to increased *Plasmodium falciparum in vitro* sensitivity to the bisquinoline piperazine. *Antimicrob Agents Chemother.* 2012; 56:3615-19.

148. Muhamad P, Chaijaroenkul W, Phompradit P, Rueangweerayut R, Tippawangkosol P, Na-Bangchang K. Polymorphic patterns of *pfprt* and *pfmdr1* in *Plasmodium falciparum* isolates along the Thai-Myanmar border. *Asian Pac J Trop Biomed.* 2013; 3:931-35.
149. Phyto AP, Ashley EA, Anderson TJ, Bozdech Z, Carrara VI, Sriprawat K, et al. Declining Efficacy of Artemisinin Combination Therapy Against *P. Falciparum* Malaria on the Thai-Myanmar Border (2003-2013): The Role of Parasite Genetic Factors. *Clin Infect Dis.* 2016; 63:784-91.
150. Asih PB, Rogers WO, Susanti AI, Rahmat A, Rozi IE, Kusumaningtyas MA, et al. Seasonal distribution of anti-malarial drug resistance alleles on the island of Sumba, Indonesia. *Malar J.* 2009; 8:222.
151. Norahmad NA, Mohd Abd Razak MR, Abdullah NR, Sastu UR, Imwong M, Muniandy PK, et al. Prevalence of *Plasmodium falciparum* Molecular Markers of Antimalarial Drug Resistance in a Residual Malaria Focus Area in Sabah, Malaysia. *PLoS One.* 2016; 11:e0165515.
152. Pathak A, Martensson A, Gawariker S, Mandliya J, Sharma A, Diwan V, et al. Characterization of drug resistance associated genetic polymorphisms among *Plasmodium falciparum* field isolates in Ujjain, Madhya Pradesh, India. *Malar J.* 2014; 13:182.
153. Gupta R, Mishra N, Kumar A, Rana R, Srivastava B, Tyagi PK, et al. Monitoring artemisinin resistance in *Plasmodium falciparum*: comparison of parasite clearance time by microscopy and real-time PCR and evaluation of mutations in *PfATPase6* gene in Odisha state of India. *Parasitol Res.* 2015; 114:3487-96.
154. Hodel EM, Marfurt J, Muller D, Rippert A, Borrmann S, Muller I, et al. Lack of multiple copies of *pfmdr1* gene in Papua New Guinea. *Trans R Soc Trop Med Hyg.* 2008; 102:1151-53.
